# Supplementary material
Source: PubMed Central journal article supplement (PMC2724085)
Supplement: 90543.2008_1.pdf [file 90543.2008_1.pdf]

**Supplemental Table 1. % Fatty acid composition of the diets  
(only fatty acids comprising >1% fatty acid content listed)**

|              | Control diet | Standard<br>High-fat | Trans-fat |
|--------------|--------------|----------------------|-----------|
| C16          | 16.5         | 22.6                 | 12.8      |
| C16:1(cis)   | 1.8          | 3.5                  |           |
| C18          | 8.2          | 12.9                 | 7.7       |
| C18:1(cis)   | 32.7         | 41.3                 | 16.7      |
| C18:1(trans) |              |                      | 51.1      |
| C18:2(cis)   | 34.6         | 14.9                 | 2.1       |
| C18:2(trans) |              |                      | 7.5       |
| C18:3(cis)   | 5.0          | 1.9                  |           |
| C20:4        |              | 1.6                  |           |
