# Supplementary material
Source: PubMed Central journal article supplement (PMC2724085)

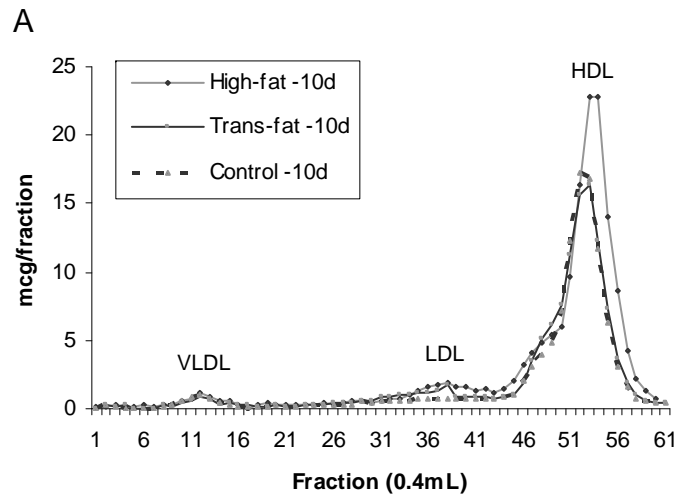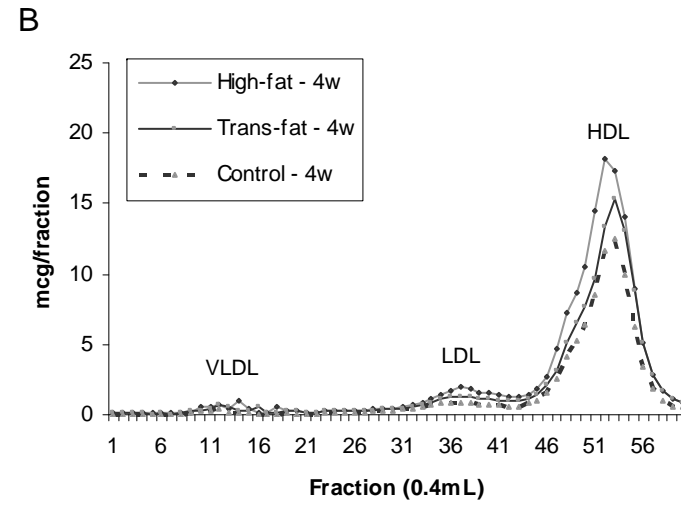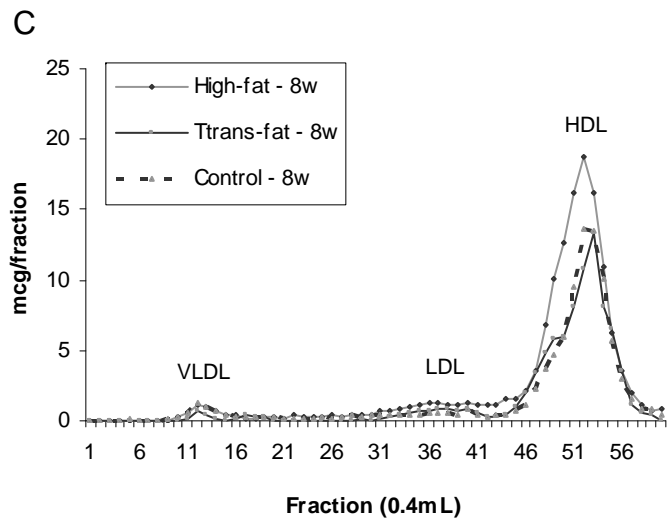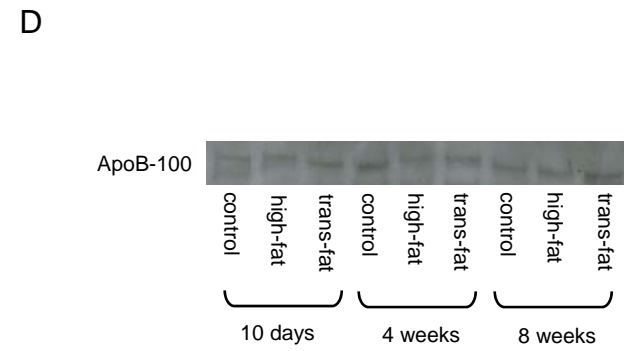

Supplement: 90543.2008_2.pdf [file 90543.2008_2.pdf]
